# Supplementary material for: H/F substitution activating tunable dimensions and dielectric–optical properties in organic lead-bromide hybrids
Source: Royal Society of Chemistry journal article supplement (doi:10.1039/d3qi02252h), 2023-12-11
Supplement: d3qi02252h1.pdf [file d3qi02252h1.pdf]

## Supplementary Information

### **H/F substitution activating tunable dimensions and dielectric-optical properties in organic lead-bromide hybrids**

*Lipeng Long,<sup>a</sup> Ziwen Huang,<sup>a</sup> Zhe-Kun Xu,<sup>b</sup> Tian Gan,<sup>b</sup> Yan Qin,<sup>b</sup> Zhengwang Chen,<sup>a</sup> and Zhong-Xia Wang<sup>\*a</sup>*

<sup>a</sup> College of Chemistry and Chemical Engineering, Gannan Normal University, Ganzhou 341000, China.

<sup>b</sup> Ordered Matter Science Research Center, Nanchang University, Nanchang 330031, China.

Email: [zhongxiawang@ncu.edu.cn](mailto:zhongxiawang@ncu.edu.cn)

**Synthesis.** All the chemical reagents were purchased from a commercial approach and used without further purification. All compounds referred to in the paper were synthesized in a general procedure by mixing the piperidine derivatives and PbBr<sub>2</sub> in a concentrated hydrobromic acid solution. Specifically, 4,4-difluoropiperidine (10 mmol) and PbBr<sub>2</sub> (5 mmol) were dissolved in a concentrated hydrobromic acid solution (20 mL) with continuous stirring for 30 minutes. Then the clear solution was slowly evaporated at 60 °C and a larger number of transparent crystals of [4,4-DFPD]<sub>2</sub>PbBr<sub>4</sub> were collected after two days. For [4-FPD]<sub>6</sub>Pb<sub>5</sub>Br<sub>16</sub>, transparent crystals were obtained by the slow evaporation of hydrobromic acid solution containing 4-fluoropiperidine (5 mmol) and PbBr<sub>2</sub> (5 mmol) for two days. Concerning [PD]PbBr<sub>3</sub>, piperidine hydrobromide (6 mmol) and PbBr<sub>2</sub> (4 mmol) were mixed in hydrobromic acid (10 mL), and then the mixture was slowly evaporated at 60 °C to receive strip crystals. Their purity confirmed by powder X-ray diffraction is shown in Figure S1.

**Single-crystal X-ray crystallography.** Variable-temperature single-crystal X-ray diffraction measurements of [PD]PbBr<sub>3</sub>, [4-FPD]<sub>6</sub>Pb<sub>5</sub>Br<sub>16</sub> and [4,4-DFPD]<sub>2</sub>PbBr<sub>4</sub> were carried out by Rigaku Oxford Diffraction 2018 diffractometer with Mo-K $\alpha$  radiation ( $\lambda$  = 0.71073 Å). Crystal data was collected with the Crystalclear software package (Rigaku, 2018). Olex2 software was utilized to solve the crystal structures in a direct method and the refinement of crystal structures on  $F^2$  was performed on the SHELXLTL software package (SHELXLTL-2014) in the full-matrix least-squares manner. Due to the disordered structures of [PD]PbBr<sub>3</sub>, [4-FPD]<sub>6</sub>Pb<sub>5</sub>Br<sub>16</sub>, and [4,4-DFPD]<sub>2</sub>PbBr<sub>4</sub> in the high-temperature phase (HTP), some restriction instructions should be adopted to handle the disordered cations. All non-hydrogen atoms were refined with anisotropy, and all H atoms were generated geometrically at the calculated positions. Drawing of asymmetric units and packing diagrams of crystals was conducted on the Diamond software. CSD deposition numbers 2195159-2195167 can be obtained free of charge from the CCDC via [www.ccdc.cam.ac.uk/getstructures](http://www.ccdc.cam.ac.uk/getstructures).

**Thermal measurements.** Differential scanning calorimetry (DSC) measurements of [PD]PbBr<sub>3</sub>, [4-FPD]<sub>6</sub>Pb<sub>5</sub>Br<sub>16</sub> and [4,4-DFPD]<sub>2</sub>PbBr<sub>4</sub> were performed on the

NETZSCH DSC 214 instrument. The polycrystalline samples were placed into an aluminum crucible and were measured with a heating/cooling rate of 20 K min<sup>-1</sup> under nitrogen. Thermal stability was measured on polycrystalline powder samples by PerkinElmer TGA 8000 at a rate of 30 K min<sup>-1</sup> in a nitrogen atmosphere.

**Dielectric measurements.** Complex dielectric permittivity  $\varepsilon$  ( $\varepsilon = \varepsilon' - i\varepsilon''$ ) measurements were performed on a Tonghui TH2828A using the polycrystalline sample, which was pressed into cylindrical tablets. Then silver glue equably on both sides of those tablets was applied and connected with a socket by copper wire to form a capacitor.

**Second harmonic generation measurement.** The second harmonic generation (SHG) measurements were performed on an Ins 1210058 optical testing stage (INTEC Instruments) with a Vibrant 355 II laser generator (OPOTEK). The laser beam was excited by pulsed Nd:YAG at a wavelength of 1064 nm, 5 ns pulse duration, 1.6 MW peak power and 10 Hz repetition rate.

**Ultraviolet–visible absorption.** UV–vis diffuse reflectance spectroscopy measurements were carried out on a Shimadzu (Tokyo, Japan) UV-3600 Plus spectrophotometer operating at room temperature from 200 to 900 nm with BaSO<sub>4</sub> used as a 100% reflectance reference.

**Fluorescence spectra.** Fluorescence was detected by a commercial Raman spectrometer equipped with a synchronicity OE detector (Horiba, LabRAM HR Evolution) under a 325 nm He-Cd laser excitation with the reflection method. The photoluminescence spectra were dispersed by a 600-groove per millimeter diffraction grating and accumulated 3 times with exposing 3 seconds at each measurement.

**Powder X-ray diffraction.** Powder X-ray diffraction (PXRD) patterns were performed on a Rigaku D/MAX 2000 with Cu-K $\alpha$  radiation. The measurement in the angle ranges from 5 to 50° with a step size of 0.02°.

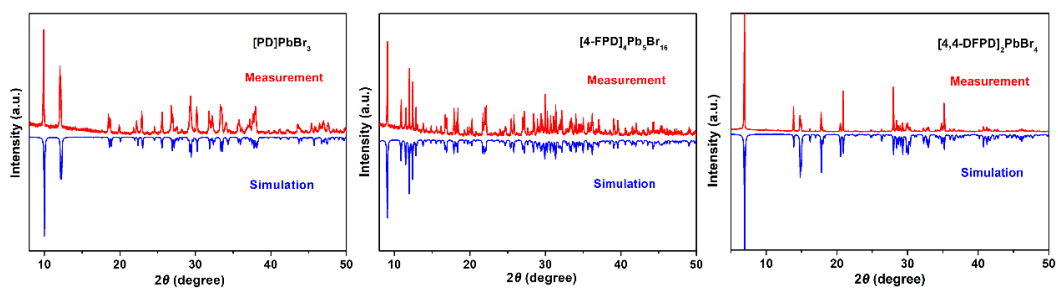

**Figure S1.** The phase purity of [PD]PbBr<sub>3</sub>, [4-FPD]<sub>6</sub>Pb<sub>5</sub>Br<sub>16</sub>, and [4,4-DFPD]<sub>2</sub>PbBr<sub>4</sub>.

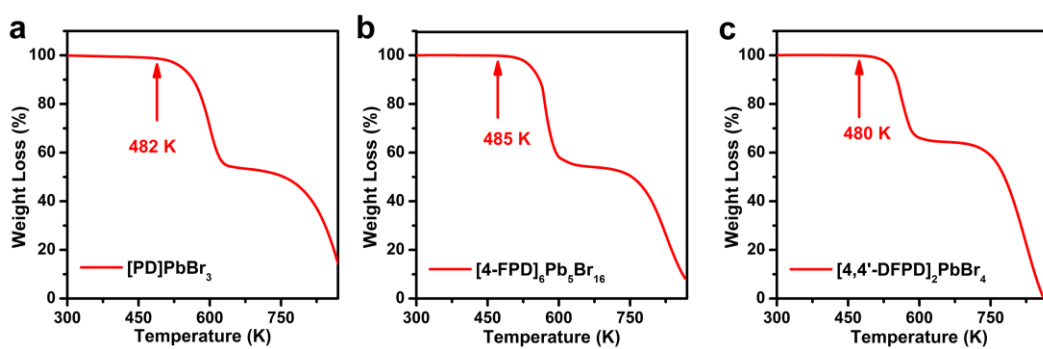

**Figure S2.** TG curves for [PD]PbBr<sub>3</sub> (a), [4-FPD]<sub>6</sub>Pb<sub>5</sub>Br<sub>16</sub> (b), and [4,4-DFPD]<sub>2</sub>PbBr<sub>4</sub> (c).

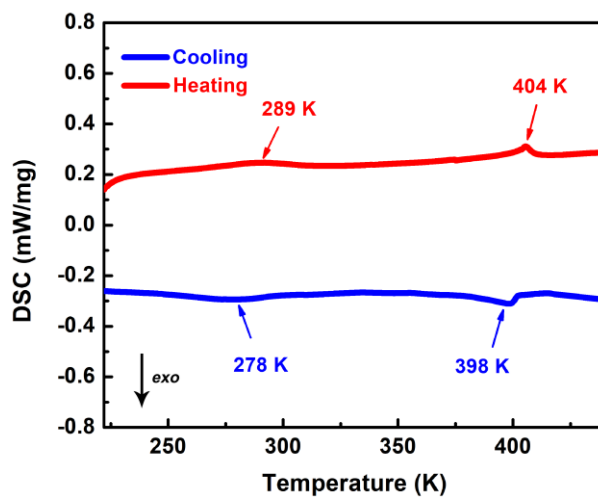

**Figure S3.** DSC curve in a heating and cooling run for [PD]PbBr<sub>3</sub>. The arrow of *exo* indicates the exothermic direction.

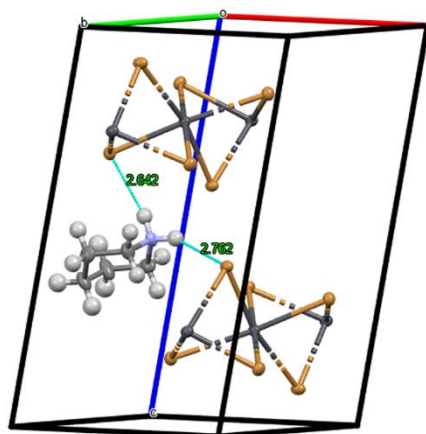

**Figure S4.** Weak N-H...Br hydrogen bonding interactions between PD cations and inorganic framework in [PD]PbBr<sub>3</sub> at 197 K.

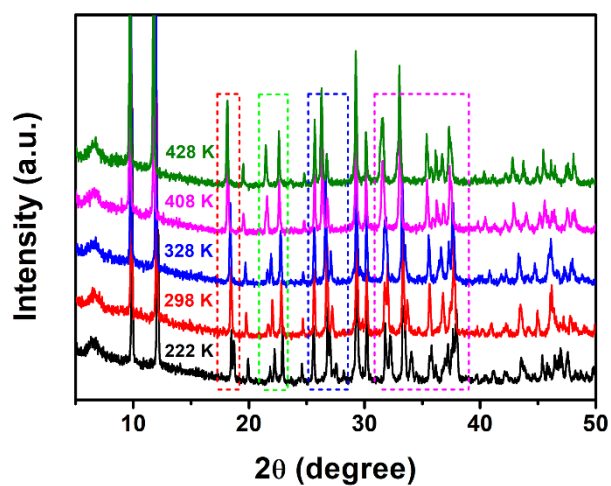

**Figure S5.** Variable-temperature PXRD patterns of [PD]PbBr<sub>3</sub>.

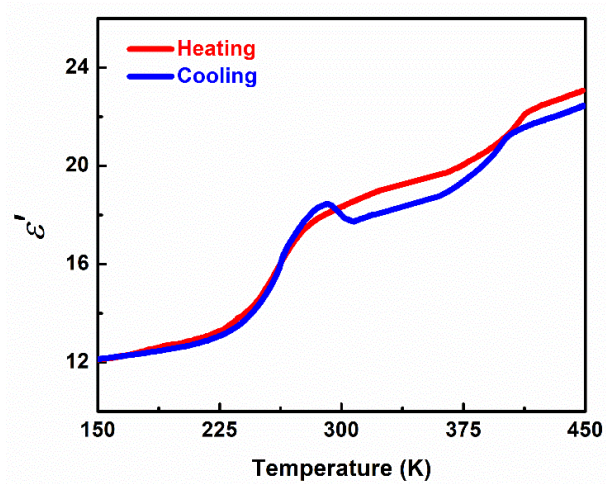

**Figure S6.** The temperature-dependent real part of the dielectric constant ( $\epsilon'$ ) performed on the powder sample of [PD]PbBr<sub>3</sub> at 1 MHz.

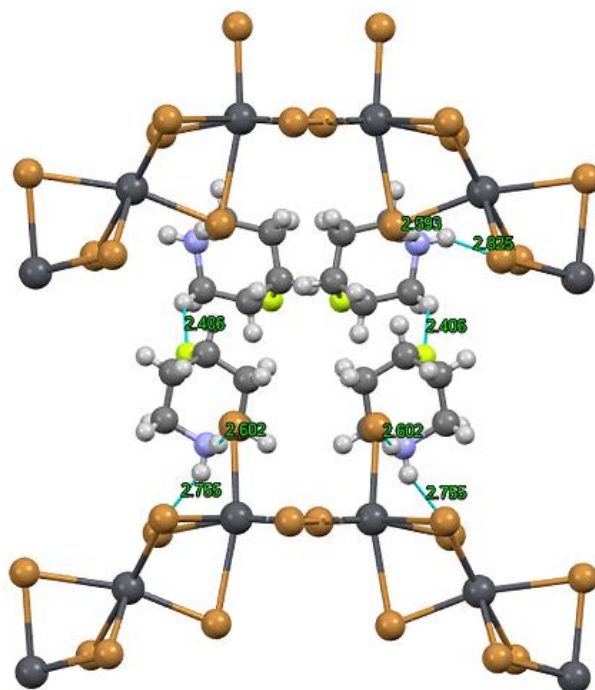

**Figure S7.** Hydrogen bonds of C–H···F and N–H···Br existed between 4-FPD cations and between 4-FPD cations and inorganic framework in  $[4\text{-FPD}]_6\text{Pb}_5\text{Br}_{16}$ .

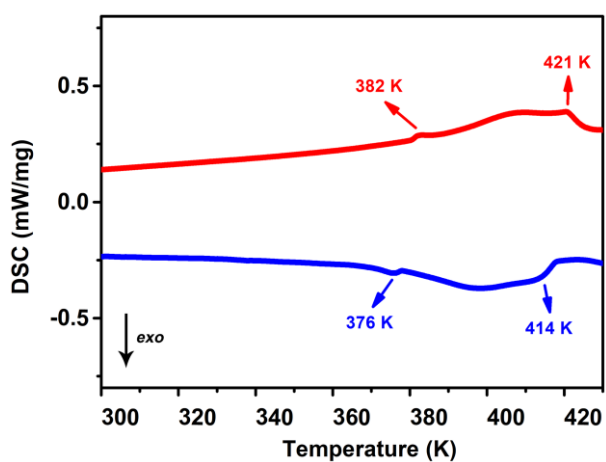

**Figure S8.** DSC curve in heating and cooling run for  $[4\text{-FPD}]_6\text{Pb}_5\text{Br}_{16}$ . The arrow of exo indicates the exothermic direction.

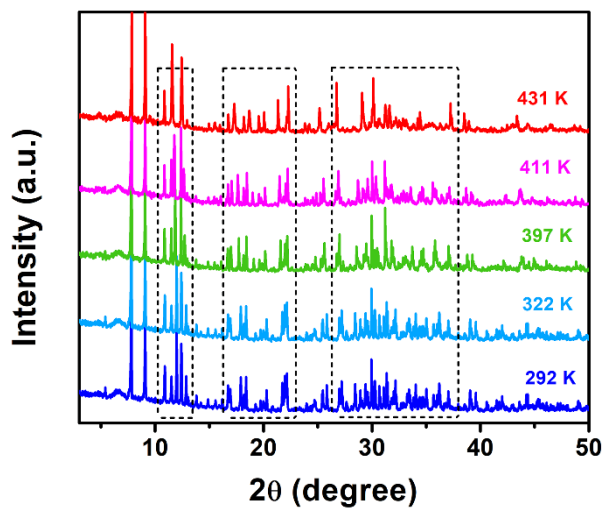

**Figure S9.** Variable-temperature PXRD patterns of  $[4\text{-FPD}]_6\text{Pb}_5\text{Br}_{16}$ .

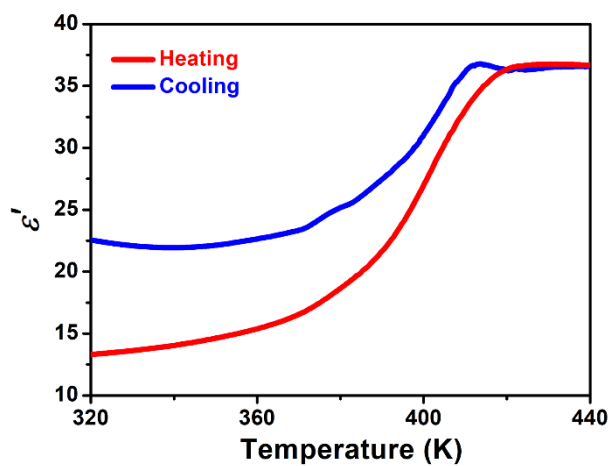

**Figure S10.** The temperature-dependent real part of the dielectric constant ( $\epsilon'$ ) performed on the powder sample of  $[4\text{-FPD}]_6\text{Pb}_5\text{Br}_{16}$  at 1 MHz.



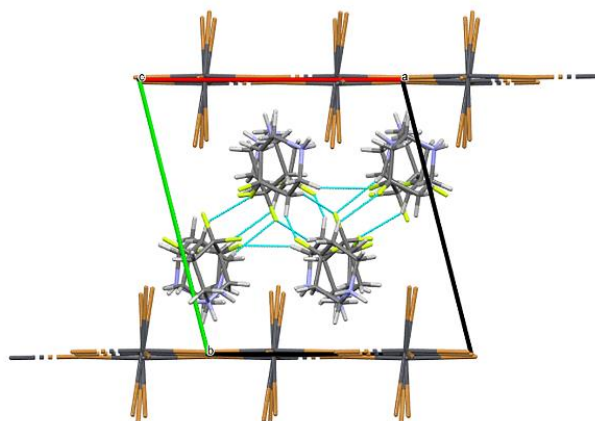

**Figure S11.** Complex hydrogen bonds existed between 4,4-DFPD cations in [4,4-DFPD]<sub>2</sub>PbBr<sub>4</sub>.

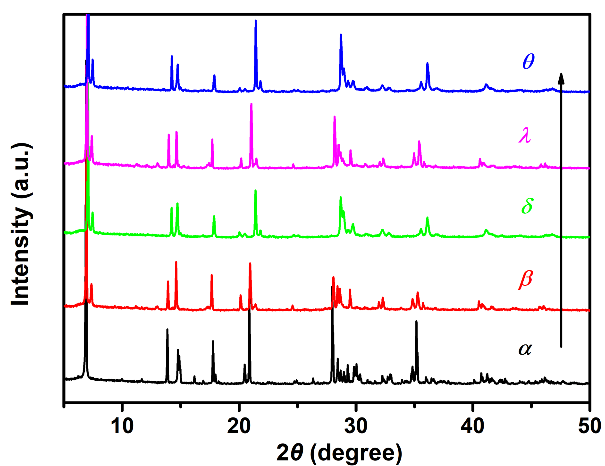

**Figure S12.** Variable-temperature PXRD patterns of [4,4-DFPD]<sub>2</sub>PbBr<sub>4</sub>. The black arrow denotes sequential test order.

**Table S1.** Crystal structure and refinement details of [PD]PbBr<sub>3</sub> and [4-FPD]<sub>6</sub>Pb<sub>5</sub>Br<sub>16</sub>.

| Compounds                 | [PD]PbBr <sub>3</sub>   | [PD]PbBr <sub>3</sub>   | [PD]PbBr <sub>3</sub> | [4-FPD] <sub>6</sub> Pb <sub>5</sub> Br <sub>16</sub> | [4-FPD] <sub>6</sub> Pb <sub>5</sub> Br <sub>16</sub> |
|---------------------------|-------------------------|-------------------------|-----------------------|-------------------------------------------------------|-------------------------------------------------------|
| Temperature               | 197 K                   | 323 K                   | 423 K                 | 299 K                                                 | 440 K                                                 |
| Crystal                   | Monoclinic              | Monoclinic              | Orthorhombic          | Monoclinic                                            | Orthorhombic                                          |
| Formula                   | 533.06                  | 533.06                  | 533.06                | 2931.17                                               | 2931.17                                               |
| Space                     | <i>P2<sub>1</sub>/n</i> | <i>P2<sub>1</sub>/n</i> | <i>Cmcm</i>           | <i>P2<sub>1</sub>/c</i>                               | <i>Cmca</i>                                           |
| <i>a</i> / Å              | 9.6329(3)               | 9.8560(5)               | 8.2943(6)             | 12.5612(5)                                            | 8.3832(7)                                             |
| <i>b</i> / Å              | 7.9359(2)               | 7.8629(4)               | 18.2287(15)           | 32.8585(16)                                           | 24.1380(15)                                           |
| <i>c</i> / Å              | 14.9282(5)              | 15.1092(7)              | 7.8044(5)             | 8.1977(3)                                             | 33.398(2)                                             |
| <i>α</i> / deg            | 90                      | 90                      | 90                    | 90                                                    | 90                                                    |
| <i>β</i> / deg            | 102.867(3)              | 102.382(5)              | 90                    | 104.943(4)                                            | 90                                                    |
| <i>γ</i> / deg            | 90                      | 90                      | 90                    | 90                                                    | 90                                                    |
| <i>V</i> / Å <sup>3</sup> | 1112.54(6)              | 1143.68(10)             | 1179.98(15)           | 3269.1(2)                                             | 6758.2(8)                                             |
| <i>Z</i>                  | 4                       | 4                       | 2                     | 2                                                     | 4                                                     |
| Radiation                 | Mo-K $\alpha$           | Mo-K $\alpha$           | Mo-K $\alpha$         | Mo-K $\alpha$                                         | Mo-K $\alpha$                                         |
| Dcalc / g                 | 3.182                   | 3.096                   | 1.466                 | 2.978                                                 | 2.889                                                 |
| GOF                       | 1.059                   | 1.047                   | 1.070                 | 1.028                                                 | 1.019                                                 |
| <i>R</i> <sub>1</sub>     | 0.0446                  | 0.0593                  | 0.0658                | 0.0354                                                | 0.0465                                                |
| <i>wR</i> <sub>2</sub>    | 0.1374                  | 0.1853                  | 0.2058                | 0.0692                                                | 0.1369                                                |

**Table S2.** Hydrogen bonds for [PD]PbBr<sub>3</sub> at 197 K

| D-H $\cdots$ A                         | d(D-H)/Å | d(H $\cdots$ A)/Å | d(D $\cdots$ A)/Å | $\angle$ DHA/ $^\circ$ |
|----------------------------------------|----------|-------------------|-------------------|------------------------|
| N(8)-H(8A) $\cdots$ Br(3)              | 0.91     | 2.64              | 3.534(8)          | 166.7                  |
| N(8)-H(8B) $\cdots$ Br(2) <sup>1</sup> | 0.91     | 2.76              | 3.538(8)          | 143.9                  |

Symmetry codes: <sup>1</sup> 1-X,1-Y,1-Z

**Table S3.** Hydrogen bonds for [4-FPD]<sub>6</sub>Pb<sub>5</sub>Br<sub>16</sub> at 299 K

| D-H···A                            | d(D-H)/Å | d(H···A)/Å | d(D···A)/Å | ∠DHA/° |
|------------------------------------|----------|------------|------------|--------|
| C(3)-H(3)···F(1) <sup>1</sup>      | 0.98     | 2.86       | 3.511(13)  | 124.2  |
| N(1)-H(1A)···Br(1) <sup>2</sup>    | 0.89     | 2.6        | 3.464(7)   | 163.2  |
| N(1)-H(1B)···Br(3) <sup>3</sup>    | 0.89     | 2.76       | 3.464(7)   | 137.5  |
| N(1)-H(1B)···Br(4) <sup>2</sup>    | 0.89     | 3          | 3.540(7)   | 120.7  |
| C(9)-H(9A)···F(1) <sup>4</sup>     | 0.97     | 2.74       | 3.353(11)  | 121.7  |
| C(1)-H(1C)···F(12A) <sup>1</sup>   | 0.97     | 2.48       | 3.422(13)  | 162.8  |
| C(10)-H(10)···F(1) <sup>4</sup>    | 0.98     | 2.78       | 3.459(11)  | 126.8  |
| C(4)-H(4A)···F(1) <sup>1</sup>     | 0.97     | 2.82       | 3.495(13)  | 127.1  |
| C(8)-H(8A)···F(23)                 | 0.97     | 2.41       | 3.216(10)  | 140.7  |
| N(2)-H(2C)···Br(7) <sup>5</sup>    | 0.89     | 2.82       | 3.477(7)   | 131.3  |
| N(2)-H(2C)···Br(8)                 | 0.89     | 2.92       | 3.511(7)   | 125.8  |
| N(2)-H(2D)···Br(5)                 | 0.89     | 2.59       | 3.447(7)   | 161.2  |
| N(3)-H(3A)···Br(6) <sup>6</sup>    | 0.89     | 2.83       | 3.609(13)  | 146.8  |
| N(3)-H(3B)···Br(8) <sup>7</sup>    | 0.89     | 2.71       | 3.583(12)  | 167.2  |
| C(14)-H(14A)···F(12A) <sup>8</sup> | 0.97     | 2.62       | 3.518(17)  | 154.3  |
| C(15)-H(15A)···Br(4) <sup>7</sup>  | 0.97     | 2.88       | 3.609(17)  | 132.3  |

Symmetry codes: <sup>1</sup>1+X,+Y,1+Z; <sup>2</sup>1+X,+Y,1+Z; <sup>3</sup>1+X,+Y,+Z; <sup>4</sup>+X,1/2-Y,1/2+Z;  
<sup>5</sup>+X,+Y,-1+Z; <sup>6</sup>1-X,-Y,1-Z; <sup>7</sup>1-X,-Y,-Z; <sup>8</sup>2-X,-Y,-Z

**Table S4.** Selected Bond lengths [ $\text{\AA}$ ] and bond angles [ $^\circ$ ] for  $[4\text{-FPD}]_6\text{Pb}_5\text{Br}_{16}$  at 299 K.

|                                                  |            |                       |            |
|--------------------------------------------------|------------|-----------------------|------------|
| Pb(1)-Br(1)                                      | 2.8194(9)  | Pb(2)-Br(3)           | 2.9659(9)  |
| Pb(1)-Br(3)                                      | 3.1643(10) | Pb(2)-Br(4)           | 3.0067(9)  |
| Pb(1)-Br(4)                                      | 3.0577(10) | Pb(2)-Br(8)           | 3.0764(10) |
| Pb(1)-Br(2)#1                                    | 3.0044(11) | Pb(2)-Br(6)           | 3.2074(11) |
| Pb(1)-Br(2)                                      | 2.9111(10) | Pb(3)-Br(7)           | 3.0266(9)  |
| Pb(2)-Br(5)                                      | 2.9012(9)  | Pb(3)-Br(8)           | 3.0154(9)  |
| Pb(2)-Br(7)                                      | 3.0547(9)  | Pb(3)-Br(6)           | 3.0298(9)  |
| Br(1)-Pb(1)-Br(3)                                | 94.19(3)   | Br(3)-Pb(2)-Br(6)     | 99.47(3)   |
| Br(1)-Pb(1)-Br(4)                                | 92.90(3)   | Br(4)-Pb(2)-Br(8)     | 88.61(3)   |
| Br(1)-Pb(1)-Br(2) #1                             | 97.50(3)   | Br(4)-Pb(2)-Br(6)     | 108.87(3)  |
| Br(1)-Pb(1)-Br(2)                                | 87.46(3)   | Br(8)-Pb(2)-Br(6)     | 80.38(3)   |
| Br(4)-Pb(1)-Br(3)                                | 83.50(3)   | Br(7)#2-Pb(3)-Br(6)   | 98.25(3)   |
| Br(2)#1-Pb(1)-Br(3)                              | 100.35(3)  | Br(7)-Pb(3)-Br(6)     | 81.75(3)   |
| Br(2)-Pb(1)-Br(4)                                | 85.54(3)   | Br(7)-Pb(3)-Br(6)#2   | 98.25(3)   |
| Br(2)-Pb(1)-Br(2) #1                             | 90.211(12) | Br(7)#2-Pb(3)-Br(6)#2 | 81.75(3)   |
| Br(5)-Pb(2)-Br(7)                                | 90.64(3)   | Br(8)-Pb(3)-Br(7)#2   | 90.20(3)   |
| Br(5)-Pb(2)-Br(3)                                | 89.80(3)   | Br(8)#2-Pb(3)-Br(7)   | 90.19(3)   |
| Br(5)-Pb(2)-Br(4)                                | 81.39(3)   | Br(8)#2-Pb(3)-Br(7)#2 | 89.80(3)   |
| Br(5)-Pb(2)-Br(8)                                | 91.04(3)   | Br(8)-Pb(3)-Br(7)     | 89.81(3)   |
| Br(7)-Pb(2)-Br(8)                                | 88.16(3)   | Br(8)-Pb(3)-Br(6)#2   | 95.72(3)   |
| Br(7)-Pb(2)-Br(6)                                | 78.49(3)   | Br(8)#2-Pb(3)-Br(6)   | 95.72(3)   |
| Br(3)-Pb(2)-Br(7)                                | 95.52(3)   | Br(8)#2-Pb(3)-Br(6)#2 | 84.28(3)   |
| Br(3)-Pb(2)-Br(4)                                | 87.86(3)   | Br(8)-Pb(3)-Br(6)     | 84.28(3)   |
| Symmetry codes:#1 +X,1/2-Y,1/2+Z; # 2 1-X,-Y,1-Z |            |                       |            |

**Table S5.** Selected Bond lengths [Å] and bond angles [°] for [4-FPD]<sub>6</sub>Pb<sub>5</sub>Br<sub>16</sub> at 440 K.

|                                                                             |            |                       |            |
|-----------------------------------------------------------------------------|------------|-----------------------|------------|
| Br(1)-Pb(1)                                                                 | 2.7908(14) | Pb(2)-Br(3)           | 3.0154(9)  |
| Pb(1)-Br(3)                                                                 | 3.0846(9)  | Pb(2)-Br(6)           | 3.1691(14) |
| Pb(1)-Br(2)                                                                 | 2.9983(3)  | Pb(2)-Br(4)           | 2.8833(13) |
| Pb(3)-Br(6)                                                                 | 3.0251(13) | Pb(2)-Br(5)           | 3.0597(10) |
| Pb(3)-Br(5)                                                                 | 3.0105(10) | Br(2)-Pb(1)#5         | 2.9983(3)  |
| Br(1)-Pb(1)-Br(3)#1                                                         | 94.66(3)   | Br(5)#1-Pb(3)-Br(5)   | 88.48(4)   |
| Br(1)-Pb(1)-Br(3)                                                           | 94.65(3)   | Br(5)#4-Pb(3)-Br(5)#3 | 88.48(4)   |
| Br(1)-Pb(1)-Br(2)#2                                                         | 91.37(4)   | Br(5)#4-Pb(3)-Br(5)   | 91.52(4)   |
| Br(1)-Pb(1)-Br(2)                                                           | 91.38(4)   | Br(5)#1-Pb(3)-Br(5)#3 | 91.52(4)   |
| Br(3)-Pb(1)-Br(3)#1                                                         | 84.47(4)   | Br(3)#1-Pb(2)-Br(3)   | 86.88(4)   |
| Br(2)#2-Pb(1)-Br(3)#1                                                       | 93.108(19) | Br(3)-Pb(2)-Br(6)     | 104.19(3)  |
| Br(2)-Pb(1)-Br(3)                                                           | 93.107(19) | Br(3)#1-Pb(2)-Br(6)   | 104.19(3)  |
| Br(2)#2-Pb(1)-Br(2)                                                         | 88.692(11) | Br(3)#1-Pb(2)-Br(5)#1 | 93.07(3)   |
| Br(5)#3-Pb(3)-Br(6)                                                         | 97.11(3)   | Br(3)-Pb(2)-Br(5)     | 93.07(3)   |
| Br(5)#1-Pb(3)-Br(6)#3                                                       | 97.11(3)   | Br(4)-Pb(2)-Br(3)     | 83.70(3)   |
| Br(5)#4-Pb(3)-Br(6)                                                         | 97.11(3)   | Br(4)-Pb(2)-Br(3)#1   | 83.70(3)   |
| Br(5)#4-Pb(3)-Br(6)#3                                                       | 82.89(3)   | Br(4)-Pb(2)-Br(5)#1   | 92.25(3)   |
| Br(5)-Pb(3)-Br(6)                                                           | 82.90(3)   | Br(4)-Pb(2)-Br(5)     | 92.24(3)   |
| Br(5)#3-Pb(3)-Br(6)#3                                                       | 82.89(3)   | Br(5)#1-Pb(2)-Br(6)   | 79.77(3)   |
| Br(5)#1-Pb(3)-Br(6)                                                         | 82.89(3)   | Br(5)-Pb(2)-Br(6)     | 79.77(3)   |
| Br(5)-Pb(3)-Br(6)#3                                                         | 97.10(3)   | Br(5)-Pb(2)-Br(5)#1   | 86.70(4)   |
| Symmetry codes:#1 1-X,+Y,+Z; #2 1/2+X,+Y,1/2-Z; #3 1-X,1-Y,-Z; #4 +X,1-Y,-Z |            |                       |            |

**Table S6.** Crystal structure and refinement details of [4,4-DFPD]<sub>2</sub>PbBr<sub>4</sub>.

| Phase                      | $\alpha$      | $\delta$      | $\lambda$     | $\theta$      |
|----------------------------|---------------|---------------|---------------|---------------|
| Temperature (K)            | 293 K         | 293 K         | 420 K         | 293 K         |
| Crystal System             | Triclinic     | Orthorhombic  | Tetragonal    | Orthorhombic  |
| Formula Weight             | 2312.32       | 771.11        | 333.13        | 1486.02       |
| Space Group                | $P\bar{1}$    | $Aea2$        | $I4/mmm$      | $Fmmm$        |
| $a$ / Å                    | 12.1732(3)    | 8.8209(11)    | 6.2229(5)     | 8.6355(9)     |
| $b$ / Å                    | 13.4785(4)    | 24.830(3)     | 6.2229(5)     | 24.748(2)     |
| $c$ / Å                    | 18.4607(5)    | 8.6568(10)    | 25.276(5)     | 8.8106(8)     |
| $\alpha$ / deg             | 76.808(2)     | 90            | 90            | 90            |
| $\beta$ / deg              | 89.923(2)     | 90            | 90            | 90            |
| $\gamma$ / deg             | 76.288(2)     | 90            | 90            | 90            |
| $V$ / Å <sup>3</sup>       | 2860.53(14)   | 1896.1(4)     | 978.8(2)      | 1882.9(3)     |
| $Z$                        | 2             | 4             | 2             | 2             |
| Radiation Type             | Mo-K $\alpha$ | Mo-K $\alpha$ | Mo-K $\alpha$ | Mo-K $\alpha$ |
| Dcalc / g cm <sup>-3</sup> | 2.685         | 2.701         | 6.217         | 2.621         |
| GOF                        | 1.023         | 1.044         | 1.014         | 1.022         |
| $R_1$                      | 0.0880        | 0.0903        | 0.0541        | 0.0633        |
| $wR_2$                     | 0.2395        | 0.2709        | 0.1378        | 0.1715        |

**Table S7.** Hydrogen bonds for [4,4-DFPD]<sub>2</sub>PbBr<sub>4</sub> at 290 K (in  $\alpha$  phase)

| D-H $\cdots$ A                              | d(D-H)/Å | d(H $\cdots$ A)/Å | d(D $\cdots$ A)/Å | $\angle$ DHA/ $^\circ$ |
|---------------------------------------------|----------|-------------------|-------------------|------------------------|
| C(00U)-H(00C) $\cdots$ F(00Q) <sup>1</sup>  | 0.97     | 2.57              | 3.47(2)           | 153.8                  |
| C(00U)-H(00D) $\cdots$ F(00P) <sup>2</sup>  | 0.97     | 2.74              | 3.38(2)           | 123.7                  |
| C(00V)-H(00G) $\cdots$ F(1) <sup>3</sup>    | 0.97     | 2.63              | 3.24(2)           | 121.2                  |
| C(00V)-H(00G) $\cdots$ F(00T) <sup>2</sup>  | 0.97     | 2.69              | 3.48(2)           | 139.3                  |
| C(00Z)-H(00A) $\cdots$ F(00J) <sup>4</sup>  | 0.97     | 2.52              | 3.37(2)           | 146.1                  |
| C(011)-H(01B) $\cdots$ F(00Y) <sup>5</sup>  | 0.97     | 2.67              | 3.42(2)           | 135                    |
| C(012)-H $\cdots$ F(00J) <sup>5</sup>       | 0.97     | 2.82              | 3.61(2)           | 139.8                  |
| C(012)-H $\cdots$ F(00P) <sup>6</sup>       | 0.97     | 2.94              | 3.63(3)           | 128.5                  |
| C(015)-H(01U) $\cdots$ F(00I) <sup>8</sup>  | 0.97     | 2.85              | 3.63(3)           | 138.7                  |
| C(015)-H(01U) $\cdots$ F(00N)               | 0.97     | 2.94              | 3.62(2)           | 128.5                  |
| C(017)-H(01R) $\cdots$ F(00I)               | 0.97     | 2.53              | 3.34(2)           | 141.7                  |
| C(01A)-H(01M) $\cdots$ F(00N) <sup>1</sup>  | 0.97     | 2.84              | 3.43(3)           | 120.7                  |
| C(01A)-H(01N) $\cdots$ F(00O) <sup>1</sup>  | 0.97     | 2.56              | 3.45(2)           | 152.4                  |
| C(01B)-H(5) $\cdots$ F(00O) <sup>3</sup>    | 0.97     | 2.72              | 3.46(2)           | 132.7                  |
| C(01D)-H(01F) $\cdots$ F(00Q) <sup>10</sup> | 0.97     | 2.71              | 3.53(2)           | 142.5                  |
| C(01F)-H(2) $\cdots$ F(00O) <sup>11</sup>   | 0.97     | 2.91              | 3.56(2)           | 125                    |
| C(01F)-H(2) $\cdots$ F(00T) <sup>6</sup>    | 0.97     | 2.84              | 3.61(2)           | 137.2                  |
| C(01I)-H(F) $\cdots$ F(00Q) <sup>12</sup>   | 0.97     | 2.89              | 3.57(3)           | 128.1                  |
| C(01I)-H(F) $\cdots$ F(00Y) <sup>9</sup>    | 0.97     | 2.86              | 3.65(2)           | 138.9                  |
| N(00X)-H(00E) $\cdots$ Br(06)               | 0.89     | 2.55              | 3.424(14)         | 167.2                  |
| N(00X)-H(00F) $\cdots$ Br(09)               | 0.89     | 2.49              | 3.288(14)         | 150.2                  |
| N(013)-H(01K) $\cdots$ Br(0A) <sup>7</sup>  | 0.89     | 2.52              | 3.308(15)         | 148.7                  |
| N(013)-H(01L) $\cdots$ Br(05) <sup>7</sup>  | 0.89     | 2.5               | 3.371(15)         | 166.8                  |
| N(016)-H(01C) $\cdots$ Br(06) <sup>7</sup>  | 0.89     | 2.81              | 3.466(14)         | 131.8                  |
| N(016)-H(01D) $\cdots$ Br(0A)               | 0.89     | 2.62              | 3.465(18)         | 159.4                  |
| N(018)-H(1) $\cdots$ Br(08)                 | 0.89     | 2.51              | 3.371(14)         | 162.7                  |
| N(018)-H(A) $\cdots$ Br(0E) <sup>6</sup>    | 0.89     | 2.87              | 3.620(13)         | 143.6                  |
| N(01C)-H(6) $\cdots$ Br(05) <sup>9</sup>    | 0.89     | 2.75              | 3.425(14)         | 133.2                  |
| N(01C)-H(C) $\cdots$ Br(09)                 | 0.89     | 2.62              | 3.460(16)         | 157                    |
| N(01G)-H(01W) $\cdots$ Br(07) <sup>9</sup>  | 0.89     | 2.5               | 3.366(16)         | 165.6                  |
| N(01G)-H(01X) $\cdots$ Br(0D)               | 0.89     | 2.95              | 3.675(15)         | 139.3                  |

Symmetry codes: <sup>1</sup>+X,-1+Y,+Z; <sup>2</sup>1-X,1-Y,2-Z; <sup>3</sup>1+X,-1+Y,+Z; <sup>4</sup>-1+X,+Y,+Z; <sup>5</sup>-1+X,1+Y,+Z; <sup>6</sup>-X,2-Y,2-Z; <sup>7</sup>-X,2-Y,1-Z; <sup>8</sup>+X,1+Y,+Z; <sup>9</sup>1-X,2-Y,1-Z; <sup>10</sup>-X,3-Y,1-Z; <sup>11</sup>-X,3-Y,2-Z; <sup>12</sup>1-X,3-Y,1-Z

**Table S8.** Selected Bond lengths [Å] and bond angles [°] for [4,4-DFPD]<sub>2</sub>PbBr<sub>4</sub> at 290 K (in *a* phase).

|                                                              |            |                       |            |
|--------------------------------------------------------------|------------|-----------------------|------------|
| Pb(1)-Br(6)                                                  | 2.9185(12) | Pb(2)-Br(C)#1         | 3.2208(11) |
| Pb(1)-Br(A)                                                  | 3.0218(13) | Pb(2)-Br(E)#2         | 3.2264(12) |
| Pb(1)-Br(B)                                                  | 3.0632(4)  | Pb(2)-Br(F)           | 2.9797(13) |
| Pb(1)-Br(D)                                                  | 3.0197(13) | Pb(3)-Br(4)#3         | 3.2374(11) |
| Pb(1)-Br(F)                                                  | 3.1119(13) | Pb(3)-Br(8)           | 2.9956(13) |
| Pb(1)-Br(G)                                                  | 3.0579(4)  | Pb(3)-Br(9)           | 2.9946(13) |
| Pb(2)-Br(4)                                                  | 2.9093(11) | Pb(3)-Br(C)           | 2.9009(12) |
| Pb(2)-Br(5)                                                  | 2.9491(13) | Pb(3)-Br(D)           | 3.1945(13) |
| Pb(2)-Br(7)                                                  | 3.0027(12) | Pb(3)-Br(E)           | 2.9968(12) |
| Br(6)-Pb(1)-Br(B)                                            | 86.68(3)   | Br(5)-Pb(2)-Br(F)     | 85.54(4)   |
| Br(6)-Pb(1)-Br(D)                                            | 88.07(4)   | Br(7)-Pb(2)-Br(C)#1   | 97.06(3)   |
| Br(6)-Pb(1)-Br(F)                                            | 92.21(4)   | Br(7)-Pb(2)-Br(E)#2   | 103.54(4)  |
| Br(6)-Pb(1)-Br(G)                                            | 91.84(3)   | Br(C)#1-Pb(2)-Br(E)#2 | 77.79(4)   |
| Br(A)-Pb(1)-Br(B)                                            | 82.14(3)   | Br(F)-Pb(2)-Br(7)     | 82.02(4)   |
| Br(A)-Pb(1)-Br(F)                                            | 90.97(4)   | Br(F)-Pb(2)-Br(C)#1   | 98.03(4)   |
| Br(A)-Pb(1)-Br(G)                                            | 99.99(3)   | Br(8)-Pb(3)-Br(4)#3   | 95.91(3)   |
| Br(B)-Pb(1)-Br(F)                                            | 84.43(3)   | Br(8)-Pb(3)-Br(D)     | 103.50(4)  |
| Br(D)-Pb(1)-Br(A)                                            | 89.80(4)   | Br(8)-Pb(3)-Br(E)     | 82.09(4)   |
| Br(D)-Pb(1)-Br(B)                                            | 100.70(3)  | Br(9)-Pb(3)-Br(4)#3   | 80.60(3)   |
| Br(D)-Pb(1)-Br(G)                                            | 91.32(3)   | Br(9)-Pb(3)-Br(D)     | 87.72(3)   |
| Br(G)-Pb(1)-Br(F)                                            | 83.55(3)   | Br(9)-Pb(3)-Br(E)     | 86.94(4)   |
| Br(4)-Pb(2)-Br(5)                                            | 86.89(3)   | Br(C)-Pb(3)-Br(8)     | 89.16(3)   |
| Br(4)-Pb(2)-Br(7)                                            | 88.54(3)   | Br(C)-Pb(3)-Br(9)     | 96.95(4)   |
| Br(4)-Pb(2)-Br(E)#2                                          | 87.37(4)   | Br(C)-Pb(3)-Br(D)     | 87.03(4)   |
| Br(4)-Pb(2)-Br(F)                                            | 96.53(4)   | Br(C)-Pb(3)-Br(E)     | 90.81(4)   |
| Br(5)-Pb(2)-Br(C)#1                                          | 90.62(3)   | Br(D)-Pb(3)-Br(4)#3   | 79.56(3)   |
| Br(5)-Pb(2)-Br(E)#2                                          | 89.29(4)   | Br(E)-Pb(3)-Br(4)#3   | 102.32(4)  |
| Symmetry codes:#1 -X,2-Y, 1-Z; #2 +X,+Y,-1+Z; #3 1-X,2-Y,1-Z |            |                       |            |

**Table S9.** Selected Bond lengths [ $\text{\AA}$ ] and bond angles [ $^\circ$ ] for  $[4,4\text{-DFPD}]_2\text{PbBr}_4$  at 293 K (in  $\delta$  phase).

|                                                                              |           |                       |            |
|------------------------------------------------------------------------------|-----------|-----------------------|------------|
| Pb(1)-Br(2)#1                                                                | 3.060(3)  | Pb(1)-Br(3)           | 2.9516(17) |
| Pb(1)-Br(2)                                                                  | 3.167(3)  |                       |            |
| Br(2)#1-Pb(1)-Br(2)#2                                                        | 86.68(11) | Br(3)#3-Pb(1)-Br(2)#3 | 88.32(6)   |
| Br(2)#2-Pb(1)-Br(2)#3                                                        | 89.493(9) | Br(3)#3-Pb(1)-Br(2)   | 94.02(6)   |
| Br(2)#3-Pb(1)-Br(2)                                                          | 94.34(10) | Br(3)-Pb(1)-Br(2)#1   | 86.26(6)   |
| Br(2)#1-Pb(1)-Br(2)                                                          | 89.492(8) | Br(3)#3-Pb(1)-Br(2)#2 | 86.26(6)   |
| Br(3)-Pb(1)-Br(2)                                                            | 88.32(6)  | Br(3)-Pb(1)-Br(2)#3   | 94.03(6)   |
| Br(3)-Pb(1)-Br(2)#2                                                          | 91.23(6)  | Br(3)#3-Pb(1)-Br(2)#1 | 91.23(6)   |
| Symmetry codes:#1 $-1/2-X,+Y,1/2+Z$ ; #2 $-1/2+X,-Y,1/2+Z$ ; #3 $-1-X,-Y,+Z$ |           |                       |            |

**Table S10.** Selected Bond lengths [ $\text{\AA}$ ] and bond angles [ $^\circ$ ] for  $[4,4\text{-DFPD}]_2\text{PbBr}_4$  at 420 K (in  $\lambda$  phase).

|                                                                                   |           |                       |          |
|-----------------------------------------------------------------------------------|-----------|-----------------------|----------|
| Pb(1)-Br(2)                                                                       | 3.1114(3) | Pb(1)-Br(0)           | 2.918(3) |
| Br(2)#1-Pb(1)-Br(2)#2                                                             | 90.0      | Br(0)-Pb(1)-Br(2)#2   | 90.0     |
| Br(2)-Pb(1)-Br(2)#2                                                               | 90.0      | Br(0)#4-Pb(1)-Br(2)#3 | 90.0     |
| Br(2)#1-Pb(1)-Br(2)#3                                                             | 90.0      | Br(0)#4-Pb(1)-Br(2)   | 90.0     |
| Br(2)-Pb(1)-Br(2)#3                                                               | 90.0      | Br(0)-Pb(1)-Br(2)#1   | 90.0     |
| Br(0)-Pb(1)-Br(2)                                                                 | 90.0      | Br(0)-Pb(1)-Br(2)#3   | 90.0     |
| Br(0)#4-Pb(1)-Br(2)#1                                                             | 90.0      | Br(0)#4-Pb(1)-Br(2)#2 | 90.0     |
| Symmetry codes:#1 $+X,1+Y,+Z$ ; #2 $-Y,+X,+Z$ ; #3 $1-Y,+X,+Z$ ; #4 $1-X,1-Y,1-Z$ |           |                       |          |

**Table S11.** Selected Bond lengths [ $\text{\AA}$ ] and bond angles [ $^\circ$ ] for  $[4,4\text{-DFPD}]_2\text{PbBr}_4$  at 293 K (in  $\theta$  phase).

|                                                                                                   |           |                       |            |
|---------------------------------------------------------------------------------------------------|-----------|-----------------------|------------|
| Pb(1)-Br(2)                                                                                       | 3.0842(2) | Pb(1)-Br(3)           | 2.9345(13) |
| Br(2)#1-Pb(1)-Br(2)#2                                                                             | 91.150(8) | Br(3)-Pb(1)-Br(2)     | 90.0       |
| Br(2)#1-Pb(1)-Br(2)#3                                                                             | 88.850(8) | Br(3)#4-Pb(1)-Br(2)#1 | 90.0       |
| Br(2)-Pb(1)-Br(2)#3                                                                               | 91.150(8) | Br(3)#4-Pb(1)-Br(2)#3 | 90.0       |
| Br(2)-Pb(1)-Br(2)#2                                                                               | 88.850(8) | Br(3)-Pb(1)-Br(2)#1   | 90.0       |
| Br(3)#4-Pb(1)-Br(2)#2                                                                             | 90.0      | Br(3)#4-Pb(1)-Br(2)   | 90.0       |
| Br(3)-Pb(1)-Br(2)#3                                                                               | 90.0      | Br(3)-Pb(1)-Br(2)#2   | 90.0       |
| Symmetry codes:#1 $-1/2+X,+Y,-1/2+Z$ ; #2 $2-X,1-Y,+Z$ ; #3 $5/2-X,1-Y,-1/2+Z$ ; #4 $2-X,1-Y,2-Z$ |           |                       |            |
